# Supplementary material for: Evolution of Pectobacterium Bacteriophage ΦM1 To Escape Two Bifunctional Type III Toxin-Antitoxin and Abortive Infection Systems through Mutations in a Single Viral Gene
Source: PubMed Central journal article supplement (PMC5377504; doi:10.1128/aem.03229-16), 2017-03-31
Supplement: AEM.03229-16_zam999117762s1.pdf [file AEM.03229-16_zam999117762s1.pdf]

1 **Supplemental material**

2

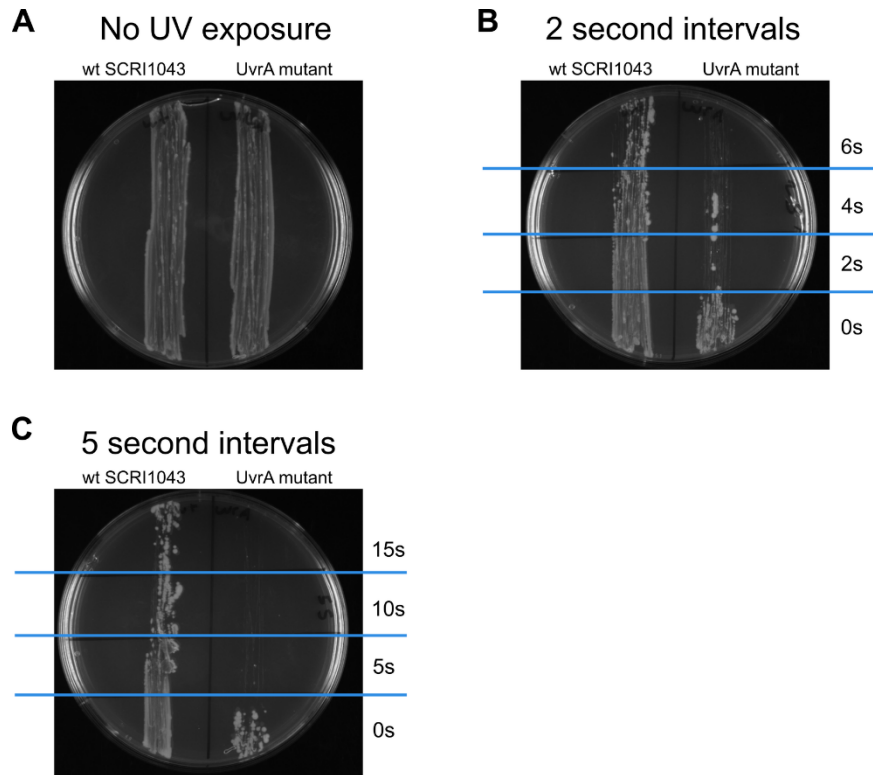

3

4 FIG S1 UV sensitivity test against *P. atrosepticum* and the *uvrA* mutant. (A) Without exposure to  
5 UV light there is no observable difference in growth between wt SCRI1043 and the *uvrA* mutant.  
6 (B), and (C) show different UV exposures at two and five seconds intervals respectively. The  
7 growth of the *uvrA* mutant is significantly reduced in these conditions while the wt strain shows  
8 a less dramatic effect.

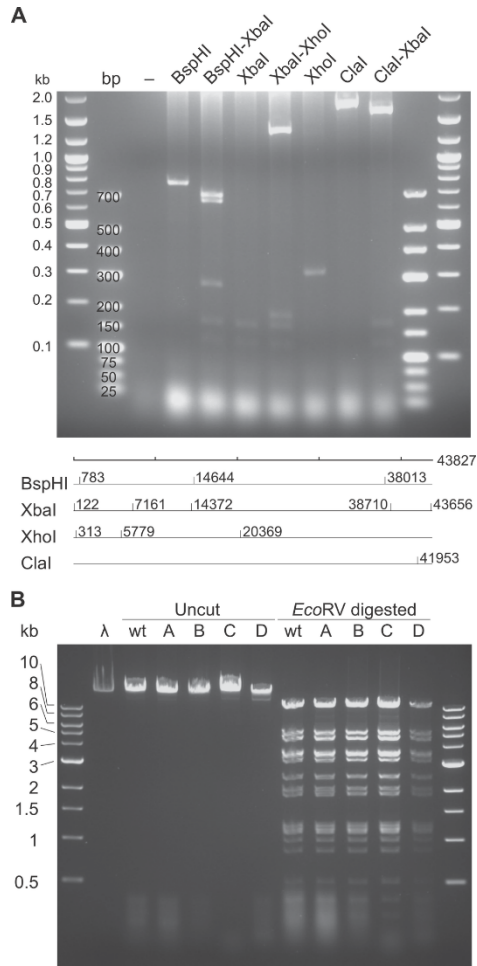

9

10 FIG S2 Restriction digest analysis of  $\Phi$ M1 wt and escape phages. (A)  $\Phi$ M1 wt contains DTRs of  
 11 approximately 293 bp. Fourteen  $\mu$ g of  $\Phi$ M1 wt genomic DNA was digested with the indicated  
 12 enzymes for 3 h, then separated by gel electrophoresis within a 2% agarose gel. The restriction  
 13 pattern matched the predicted digest from the finalised  $\Phi$ M1 wt genomic sequence, as indicated  
 14 below the gel image. An uncut sample lane is shown in "-". (B) There are no gross genetic  
 15 changes between  $\Phi$ M1 wt and the selected escape phages  $\Phi$ M1 A, B, C and D. Genomic DNA  
 16 from each phage was digested with *EcoRV* for 3 hours then separated by gel electrophoresis  
 17 within a 1% agarose gel. Genomic DNA from phage  $\lambda$  (48,502 bp) was used as a high molecular  
 18 weight marker for genomic DNA sizing.

19

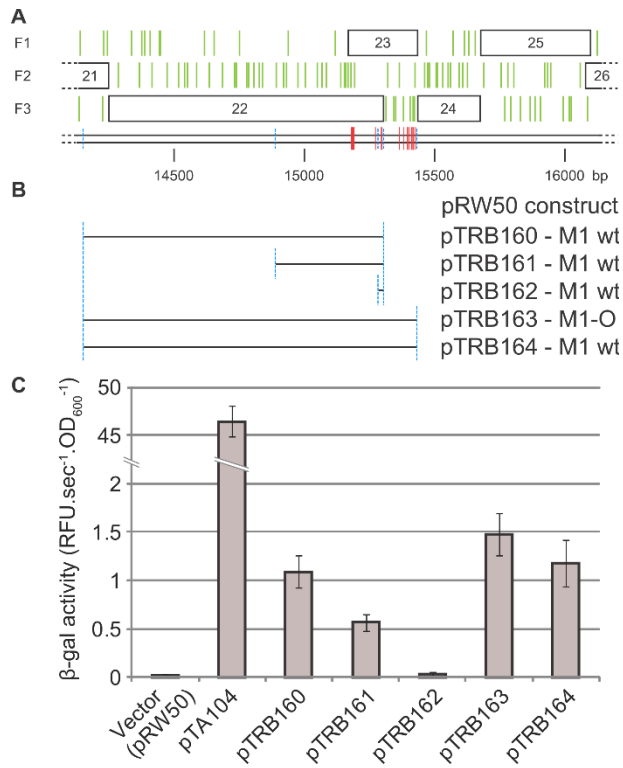

20

21 FIG S3 *phiM1-23* has a weak promoter upstream. (A) and (B) Sections of the  $\Phi$ M1 escape locus  
 22 were cloned into the LacZ reporter plasmid pRW50. Blue dotted lines in (A) reflect the construct  
 23 boundaries in (B). The figure is drawn to scale. (C) These constructs were tested for LacZ  
 24 activity in liquid assays. There is a promoter immediately upstream of *phiM1-23*, though the  
 25 activity is weak compared to the positive control, pTA104, which contains the constitutive  
 26 ToxIN<sub>Pa</sub> promoter.

27

28

29

30

31

32

33

TABLE S1 Details of ORFs and tRNA within the  $\Phi$ M1 wild type genome

| Gene            | Start position (bp) | End position (bp) | Length (bp) | Size (aa) | E value                | *Significant BLAST hit (Organism)                                          | Accession No. |
|-----------------|---------------------|-------------------|-------------|-----------|------------------------|----------------------------------------------------------------------------|---------------|
| <i>phiM1-01</i> | 785                 | 940               | 156         | 52        | 1 x 10 <sup>-7</sup>   | Hypothetical protein SMR0164 ( <i>Serratia marcescens</i> plasmid R478)    | NP_941234     |
| <i>phiM1-02</i> | 1348                | 1542              | 195         | 65        | N/A                    | No significant homologue                                                   | -             |
| <i>phiM1-03</i> | 1542                | 1730              | 189         | 63        | N/A                    | No significant homologue                                                   | -             |
| <i>phiM1-04</i> | 1868                | 2434              | 567         | 189       | 2 x 10 <sup>-16</sup>  | Hypothetical protein, gp2 ( <i>Vibrio</i> phage VP93)                      | ACP44073      |
| <i>phiM1-05</i> | 2501                | 2761              | 261         | 87        | N/A                    | No significant homologue                                                   | -             |
| <i>phiM1-06</i> | 2841                | 2948              | 108         | 36        | N/A                    | No significant homologue                                                   | -             |
| <i>phiM1-07</i> | 3105                | 3281              | 177         | 59        | N/A                    | No significant homologue                                                   | -             |
| <i>phiM1-08</i> | 3281                | 3622              | 342         | 114       | 1 x 10 <sup>-4</sup>   | Hypothetical protein, gp5 ( <i>Vibrio</i> phage VP93)                      | ACP44076      |
| <i>phiM1-09</i> | 3643                | 5373              | 1731        | 577       | N/A                    | No significant homologues                                                  | -             |
| <i>phiM1-10</i> | 5366                | 6334              | 969         | 323       | 4 x 10 <sup>-31</sup>  | Putative peptidase, gp7 ( <i>Vibrio</i> phage VP93)                        | ACP44078      |
| <i>phiM1-11</i> | 6324                | 6755              | 432         | 144       | N/A                    | No significant homolog                                                     | -             |
| <i>phiM1-12</i> | 6888                | 7730              | 843         | 281       | 4 x 10 <sup>-27</sup>  | Putative primase DnaG, gp10 ( <i>Vibrio</i> phage VP93)                    | ACP44081      |
| <i>phiM1-13</i> | 7821                | 8054              | 234         | 78        | N/A                    | No significant homolog                                                     | -             |
| <i>phiM1-14</i> | 8058                | 9317              | 1260        | 420       | 2 x 10 <sup>-117</sup> | DnaB, putative DNA helicase, gp23 ( <i>Pseudomonas</i> phage LKA1)         | CAK24991      |
| <i>phiM1-15</i> | 9586                | 9792              | 207         | 69        | N/A                    | No significant homolog                                                     | -             |
| <i>phiM1-16</i> | 9827                | 10051             | 225         | 75        | N/A                    | No significant homolog                                                     | -             |
| <i>phiM1-17</i> | 10047               | 10343             | 297         | 99        | N/A                    | No significant homolog                                                     | -             |
| <i>phiM1-18</i> | 10339               | 10518             | 180         | 60        | N/A                    | No significant homolog                                                     | -             |
| <i>phiM1-19</i> | 10588               | 11070             | 483         | 161       | 2 x 10 <sup>-23</sup>  | Hypothetical protein, Orf78 ( <i>Pseudomonas</i> phage D3)                 | AAF80834      |
| <i>phiM1-20</i> | 11045               | 13384             | 2340        | 780       | 0.0                    | Putative DNA polymerase, gp14 ( <i>Vibrio</i> phage VP93)                  | ACP44085      |
| <i>phiM1-21</i> | 13406               | 14239             | 834         | 278       | 2 x 10 <sup>-31</sup>  | Hypothetical protein, gp31 ( <i>Pseudomonas</i> phage LKA1)                | CAK24999      |
| <i>phiM1-22</i> | 14256               | 15299             | 1044        | 348       | 1 x 10 <sup>-69</sup>  | Putative DNA exonuclease, gp32 ( <i>Pseudomonas</i> phage LKA1)            | CAK25000      |
| <i>phiM1-23</i> | 15169               | 15423             | 255         | 85        | N/A                    | No significant homolog                                                     | -             |
| <i>phiM1-24</i> | 15423               | 15665             | 243         | 81        | N/A                    | No significant homolog                                                     | -             |
| <i>phiM1-25</i> | 15661               | 16083             | 423         | 141       | 8 x 10 <sup>-34</sup>  | Putative DNA endonuclease, gp33 ( <i>Pseudomonas</i> phage LKA1)           | CAK25001      |
| <i>phiM1-26</i> | 16067               | 16285             | 219         | 73        | N/A                    | No significant homolog                                                     | -             |
| <i>phiM1-27</i> | 16450               | 17421             | 972         | 324       | 3 x 10 <sup>-72</sup>  | Hypothetical phosphatase, gp23 ( <i>Enterobacteria</i> phage SP6)          | AAP48762      |
| <i>phiM1-28</i> | 17535               | 17900             | 366         | 122       | 8 x 10 <sup>-26</sup>  | PseT polynucleotide kinase, gp27 ( <i>Erwinia amylovora</i> phage Era 103) | ABM63417      |
| <i>phiM1-29</i> | 17900               | 18199             | 300         | 100       | 1 x 10 <sup>-13</sup>  | Hypothetical protein, gp35 ( <i>Pseudomonas</i> phage LKA1)                | CAK25003      |
| <i>phiM1-30</i> | 18317               | 18496             | 180         | 60        | N/A                    | No significant homolog                                                     | -             |
| <i>phiM1-31</i> | 18506               | 20947             | 2442        | 814       | 9 x 10 <sup>-101</sup> | T3/T7-like RNA polymerase, gp37 ( <i>Pseudomonas</i> phage LKA1)           | CAK25005      |
| <i>phiM1-32</i> | 21043               | 21237             | 195         | 65        | N/A                    | No significant homolog                                                     | -             |

\*BLAST searches performed 2012

TABLE S1 continued. Details of ORFs and tRNA within the  $\Phi$ M1 wild type genome

| Gene                      | Start position (bp) | End position (bp) | Length (bp) | Size (aa) | E value              | *Significant BLAST hit (Organism)                                            | Accession No. |
|---------------------------|---------------------|-------------------|-------------|-----------|----------------------|------------------------------------------------------------------------------|---------------|
| <i>phiM1-33</i>           | 21215               | 21625             | 411         | 137       | N/A                  | No significant homolog                                                       | -             |
| <i>phiM1-34</i>           | 21645               | 21944             | 300         | 100       | N/A                  | No significant homolog                                                       | -             |
| <i>phiM1-35</i>           | 21950               | 23458             | 1509        | 503       | $4 \times 10^{-120}$ | Putative head-tail connector protein, gp27 ( <i>Vibrio</i> phage VP93)       | ACP44098      |
| <i>phiM1-36</i>           | 23461               | 24327             | 867         | 289       | $2 \times 10^{-15}$  | Putative scaffolding protein, gp28 ( <i>Vibrio</i> phage VP93)               | ACP44099      |
| <i>phiM1-37</i>           | 24344               | 24799             | 456         | 152       | $1 \times 10^{-7}$   | Putative HNH endonuclease, gp21 ( <i>Enterobacteria</i> phage T7)            | AAP33928      |
| <i>phiM1-38</i>           | 24799               | 25779             | 981         | 327       | $8 \times 10^{-82}$  | Putative capsid protein, gp29 ( <i>Vibrio</i> phage VP93)                    | ACP44100      |
| <i>tRNA<sup>lle</sup></i> | 25840               | 25937             | 98          | N/A       |                      | Detected de novo using tRNAScan                                              | -             |
| <i>phiM1-39</i>           | 259555              | 26509             | 555         | 185       | $3 \times 10^{-29}$  | Putative tail tubular protein A, gp30 ( <i>Vibrio</i> phage VP93)            | ACP44101      |
| <i>phiM1-40</i>           | 26522               | 28849             | 2328        | 776       | $2 \times 10^{-145}$ | Putative tail tubular protein B, gp31 ( <i>Vibrio</i> phage VP93)            | ACP44102      |
| <i>phiM1-41</i>           | 28849               | 29460             | 612         | 204       | $7 \times 10^{-6}$   | Hypothetical protein, gp32 ( <i>Vibrio</i> phage VP93)                       | ACP44103      |
| <i>phiM1-42</i>           | 29473               | 32184             | 2712        | 904       | $5 \times 10^{-9}$   | Putative injection needle component, gp33 ( <i>Vibrio</i> phage VP93)        | ACP44104      |
| <i>phiM1-43</i>           | 32197               | 35985             | 3789        | 1263      | $1 \times 10^{-80}$  | Putative internal core protein, gp34 ( <i>Vibrio</i> phage VP93)             | ACP44105      |
| <i>phiM1-44</i>           | 35998               | 37599             | 1602        | 534       | $2 \times 10^{-22}$  | Putative tail-fibre protein, gp35 ( <i>Vibrio</i> phage VP93)                | ACP44106      |
| <i>phiM1-45</i>           | 37611               | 37895             | 285         | 95        | $1 \times 10^{-12}$  | Putative DNA maturase A, gp37 ( <i>Vibrio</i> phage VP93)                    | ACP44108      |
| <i>phiM1-46</i>           | 37907               | 39721             | 1815        | 605       | 0.0                  | Putative DNA maturase B, gp38 ( <i>Vibrio</i> phage VP93)                    | ACP44109      |
| <i>phiM1-47</i>           | 39733               | 39918             | 186         | 62        | N/A                  | No significant homolog                                                       |               |
| <i>phiM1-48</i>           | 39932               | 40468             | 537         | 179       | $5 \times 10^{-5}$   | Putative structural protein, gp56 ( <i>Pseudomonas</i> phage LKA1)           | CAK25024      |
| <i>phiM1-49</i>           | 40481               | 40864             | 384         | 128       | $2 \times 10^{-10}$  | Hypothetical protein, gp65 ( <i>Enterobacteria</i> phage RTP)                | CAJ42269      |
| <i>phiM1-50</i>           | 40860               | 41123             | 264         | 88        | 2.8                  | Hol, putative holing protein, Orf28 ( <i>Pasteurelia</i> phage F108)         | AAZ93663      |
| <i>phiM1-51</i>           | 41110               | 41712             | 603         | 201       | $1 \times 10^{-9}$   | Putative lysozyme-like endolysin, gp37 ( <i>Erwinia</i> phage $\Phi$ Ea21-4) | ACH88950      |
| <i>phiM1-52</i>           | 41730               | 43487             | 1758        | 586       | $3 \times 10^{-36}$  | Tailspike protein ( <i>Salmonella</i> phage Det7)                            | CA078738      |

35 \*BLAST searches performed 2012

36

37

38

39

TABLE S2 M1-23 mutations

| Phages        | Mutation relative to $\Phi$ M1 wt | Location relative to <i>phiM1-23</i> | Effect on M1-23      | Effect on exonuclease | Number of phages |
|---------------|-----------------------------------|--------------------------------------|----------------------|-----------------------|------------------|
| $\Phi$ M1-E1  | 15169 A to C                      | A1C                                  | Met to Leu           | Tyr to Ser            | 4                |
| $\Phi$ M1-E2  |                                   |                                      |                      |                       |                  |
| $\Phi$ M1-E3  |                                   |                                      |                      |                       |                  |
| $\Phi$ M1-E4  |                                   |                                      |                      |                       |                  |
| $\Phi$ M1-C   |                                   |                                      |                      |                       |                  |
| $\Phi$ M1-E5  |                                   |                                      |                      |                       |                  |
| $\Phi$ M1-E6  |                                   |                                      |                      |                       |                  |
| $\Phi$ M1-E7  |                                   |                                      |                      |                       |                  |
| $\Phi$ M1-E8  |                                   |                                      |                      |                       |                  |
| $\Phi$ M1-E9  |                                   |                                      |                      |                       |                  |
| $\Phi$ M1-U4  |                                   |                                      |                      |                       |                  |
| $\Phi$ M1-U5  |                                   |                                      |                      |                       |                  |
| $\Phi$ M1-U6  |                                   |                                      |                      |                       |                  |
| $\Phi$ M1-U9  |                                   |                                      |                      |                       |                  |
| $\Phi$ M1-E10 | 15171 G to A                      | G3A                                  | Met to Ile           | Asp to Asn            | 1                |
| $\Phi$ M1-E11 | 15175 A to T                      | A7T                                  | Lys to Stop          | Gln to Leu            | 1                |
| $\Phi$ M1-E12 | 15256 A to T                      | A88T                                 | Lys to Stop          | Glu to Val            | 1                |
| $\Phi$ M1-X   | 15288 AA to A                     | AA120A                               | FS to Stop after 9aa | FS to Stop after 45aa | 4                |
| $\Phi$ M1-E13 |                                   |                                      |                      |                       |                  |
| $\Phi$ M1-E14 |                                   |                                      |                      |                       |                  |
| $\Phi$ M1-E15 |                                   |                                      |                      |                       |                  |
| $\Phi$ M1-B   |                                   |                                      |                      |                       |                  |
| $\Phi$ M1-E16 |                                   |                                      |                      |                       |                  |
| $\Phi$ M1-E17 |                                   |                                      |                      |                       |                  |
| $\Phi$ M1-E18 |                                   |                                      |                      |                       |                  |
| $\Phi$ M1-E19 |                                   |                                      |                      |                       |                  |
| $\Phi$ M1-E20 |                                   |                                      |                      |                       |                  |
| $\Phi$ M1-E21 | 15292 C to T                      | C124T                                | Arg to Stop          | Pro to Leu            | 6                |
| $\Phi$ M1-E16 |                                   |                                      |                      |                       |                  |
| $\Phi$ M1-E17 |                                   |                                      |                      |                       |                  |
| $\Phi$ M1-E18 |                                   |                                      |                      |                       |                  |
| $\Phi$ M1-E19 |                                   |                                      |                      |                       |                  |
| $\Phi$ M1-E20 |                                   |                                      |                      |                       |                  |
| $\Phi$ M1-E21 |                                   |                                      |                      |                       |                  |
| $\Phi$ M1-E22 |                                   |                                      |                      |                       |                  |
| $\Phi$ M1-E23 |                                   |                                      |                      |                       |                  |
| $\Phi$ M1-Y   |                                   |                                      |                      |                       |                  |
| $\Phi$ M1-E21 | 15359 T to C                      | T191C                                | Leu to Pro           | -                     | 1                |
| $\Phi$ M1-E22 |                                   |                                      |                      |                       |                  |
| $\Phi$ M1-E23 |                                   |                                      |                      |                       |                  |
| $\Phi$ M1-Y   |                                   |                                      |                      |                       |                  |
| $\Phi$ M1-W   |                                   |                                      |                      |                       |                  |
| $\Phi$ M1-E24 |                                   |                                      |                      |                       |                  |
| $\Phi$ M1-E25 |                                   |                                      |                      |                       |                  |
| $\Phi$ M1-U7  |                                   |                                      |                      |                       |                  |
| $\Phi$ M1-O   |                                   |                                      |                      |                       |                  |
| $\Phi$ M1-Q   |                                   |                                      |                      |                       |                  |
| $\Phi$ M1-E26 | 15384 T to G                      | T216G                                | Tyr to Stop          | -                     | 2                |
| $\Phi$ M1-E27 |                                   |                                      |                      |                       |                  |
| $\Phi$ M1-D   |                                   |                                      |                      |                       |                  |
| $\Phi$ M1-E   |                                   |                                      |                      |                       |                  |
| $\Phi$ M1-E28 |                                   |                                      |                      |                       |                  |
| $\Phi$ M1-V   |                                   |                                      |                      |                       |                  |
| $\Phi$ M1-E29 |                                   |                                      |                      |                       |                  |
| $\Phi$ M1-A   |                                   |                                      |                      |                       |                  |
| $\Phi$ M1-E30 |                                   |                                      |                      |                       |                  |
| $\Phi$ M1-E21 | 15397 G to A                      | G229A                                | Asp to Asn           | -                     | 1                |
| $\Phi$ M1-W   |                                   |                                      |                      |                       |                  |
| $\Phi$ M1-E24 |                                   |                                      |                      |                       |                  |
| $\Phi$ M1-E25 |                                   |                                      |                      |                       |                  |
| $\Phi$ M1-U7  |                                   |                                      |                      |                       |                  |
| $\Phi$ M1-O   |                                   |                                      |                      |                       |                  |
| $\Phi$ M1-Q   |                                   |                                      |                      |                       |                  |
| $\Phi$ M1-E26 |                                   |                                      |                      |                       |                  |
| $\Phi$ M1-E27 |                                   |                                      |                      |                       |                  |
| $\Phi$ M1-E21 | 15398 A to T                      | A230T                                | Asp to Val           | -                     | 1                |
| $\Phi$ M1-W   |                                   |                                      |                      |                       |                  |
| $\Phi$ M1-E24 |                                   |                                      |                      |                       |                  |
| $\Phi$ M1-E25 |                                   |                                      |                      |                       |                  |
| $\Phi$ M1-U7  |                                   |                                      |                      |                       |                  |
| $\Phi$ M1-O   |                                   |                                      |                      |                       |                  |
| $\Phi$ M1-Q   |                                   |                                      |                      |                       |                  |
| $\Phi$ M1-E26 |                                   |                                      |                      |                       |                  |
| $\Phi$ M1-E27 |                                   |                                      |                      |                       |                  |
| $\Phi$ M1-E24 | 15398 A to C                      | A230C                                | Asp to Ala           | -                     | 2                |
| $\Phi$ M1-E25 |                                   |                                      |                      |                       |                  |
| $\Phi$ M1-U7  |                                   |                                      |                      |                       |                  |
| $\Phi$ M1-O   |                                   |                                      |                      |                       |                  |
| $\Phi$ M1-Q   |                                   |                                      |                      |                       |                  |
| $\Phi$ M1-E26 |                                   |                                      |                      |                       |                  |
| $\Phi$ M1-E27 |                                   |                                      |                      |                       |                  |
| $\Phi$ M1-D   |                                   |                                      |                      |                       |                  |
| $\Phi$ M1-E   |                                   |                                      |                      |                       |                  |
| $\Phi$ M1-E21 | 15398 A to G                      | A230G                                | Asp to Gly           | -                     | 1                |
| $\Phi$ M1-U7  |                                   |                                      |                      |                       |                  |
| $\Phi$ M1-O   |                                   |                                      |                      |                       |                  |
| $\Phi$ M1-Q   |                                   |                                      |                      |                       |                  |
| $\Phi$ M1-E26 |                                   |                                      |                      |                       |                  |
| $\Phi$ M1-E27 |                                   |                                      |                      |                       |                  |
| $\Phi$ M1-D   |                                   |                                      |                      |                       |                  |
| $\Phi$ M1-E   |                                   |                                      |                      |                       |                  |
| $\Phi$ M1-E28 |                                   |                                      |                      |                       |                  |
| $\Phi$ M1-E21 | 15407 A to C                      | A239C                                | Gln to Pro           | -                     | 4                |
| $\Phi$ M1-U7  |                                   |                                      |                      |                       |                  |
| $\Phi$ M1-O   |                                   |                                      |                      |                       |                  |
| $\Phi$ M1-Q   |                                   |                                      |                      |                       |                  |
| $\Phi$ M1-E26 |                                   |                                      |                      |                       |                  |
| $\Phi$ M1-E27 |                                   |                                      |                      |                       |                  |
| $\Phi$ M1-D   |                                   |                                      |                      |                       |                  |
| $\Phi$ M1-E   |                                   |                                      |                      |                       |                  |
| $\Phi$ M1-E28 |                                   |                                      |                      |                       |                  |
| $\Phi$ M1-E21 | 15410 T to C                      | T242C                                | Met to Thr           | -                     | 2                |
| $\Phi$ M1-D   |                                   |                                      |                      |                       |                  |
| $\Phi$ M1-E   |                                   |                                      |                      |                       |                  |
| $\Phi$ M1-E28 |                                   |                                      |                      |                       |                  |
| $\Phi$ M1-V   |                                   |                                      |                      |                       |                  |
| $\Phi$ M1-E29 |                                   |                                      |                      |                       |                  |
| $\Phi$ M1-A   |                                   |                                      |                      |                       |                  |
| $\Phi$ M1-E30 |                                   |                                      |                      |                       |                  |
| $\Phi$ M1-E30 |                                   |                                      |                      |                       |                  |
| $\Phi$ M1-E21 | 15410 T to G                      | T242G                                | Met to Arg           | -                     | 1                |
| $\Phi$ M1-E28 |                                   |                                      |                      |                       |                  |
| $\Phi$ M1-V   |                                   |                                      |                      |                       |                  |
| $\Phi$ M1-E29 |                                   |                                      |                      |                       |                  |
| $\Phi$ M1-A   |                                   |                                      |                      |                       |                  |
| $\Phi$ M1-E30 |                                   |                                      |                      |                       |                  |
| $\Phi$ M1-E30 |                                   |                                      |                      |                       |                  |
| $\Phi$ M1-E30 |                                   |                                      |                      |                       |                  |
| $\Phi$ M1-E30 |                                   |                                      |                      |                       |                  |
| $\Phi$ M1-E21 | 15415 T to G                      | T247G                                | Tyr to Asp           | -                     | 2                |
| $\Phi$ M1-V   |                                   |                                      |                      |                       |                  |
| $\Phi$ M1-E29 |                                   |                                      |                      |                       |                  |
| $\Phi$ M1-A   |                                   |                                      |                      |                       |                  |
| $\Phi$ M1-E30 |                                   |                                      |                      |                       |                  |
| $\Phi$ M1-E30 |                                   |                                      |                      |                       |                  |
| $\Phi$ M1-E30 |                                   |                                      |                      |                       |                  |
| $\Phi$ M1-E30 |                                   |                                      |                      |                       |                  |
| $\Phi$ M1-E30 |                                   |                                      |                      |                       |                  |
| $\Phi$ M1-E21 | 15416 A to C                      | A248C                                | Tyr to Ser           | -                     | 2                |
| $\Phi$ M1-A   |                                   |                                      |                      |                       |                  |
| $\Phi$ M1-E30 |                                   |                                      |                      |                       |                  |
| $\Phi$ M1-E30 |                                   |                                      |                      |                       |                  |
| $\Phi$ M1-E30 |                                   |                                      |                      |                       |                  |
| $\Phi$ M1-E30 |                                   |                                      |                      |                       |                  |
| $\Phi$ M1-E30 |                                   |                                      |                      |                       |                  |
| $\Phi$ M1-E30 |                                   |                                      |                      |                       |                  |
| $\Phi$ M1-E30 |                                   |                                      |                      |                       |                  |

40

41

TABLE S2 continued. M1-23 mutations

| Phages                  | Mutation relative to $\Phi$ M1 wt | Location relative to <i>phiM1-23</i> | Effect on M123       | Effect on exonuclease | Number of phages |
|-------------------------|-----------------------------------|--------------------------------------|----------------------|-----------------------|------------------|
| $\Phi$ M1-Z             | 15416 A to G                      | A248G                                | Tyr to Cys           | -                     | 21               |
| $\Phi$ M1-E31           |                                   |                                      |                      |                       |                  |
| $\Phi$ M1-E32           |                                   |                                      |                      |                       |                  |
| $\Phi$ M1-E33           |                                   |                                      |                      |                       |                  |
| $\Phi$ M1-E34           |                                   |                                      |                      |                       |                  |
| $\Phi$ M1-E35           |                                   |                                      |                      |                       |                  |
| $\Phi$ M1-E36           |                                   |                                      |                      |                       |                  |
| $\Phi$ M1-E37           |                                   |                                      |                      |                       |                  |
| $\Phi$ M1-E38           |                                   |                                      |                      |                       |                  |
| $\Phi$ M1-E39           |                                   |                                      |                      |                       |                  |
| $\Phi$ M1-E40           |                                   |                                      |                      |                       |                  |
| $\Phi$ M1-E41           |                                   |                                      |                      |                       |                  |
| $\Phi$ M1-E42           |                                   |                                      |                      |                       |                  |
| $\Phi$ M1-E43           |                                   |                                      |                      |                       |                  |
| $\Phi$ M1-E44           |                                   |                                      |                      |                       |                  |
| $\Phi$ M1-E45           |                                   |                                      |                      |                       |                  |
| $\Phi$ M1-E46           |                                   |                                      |                      |                       |                  |
| $\Phi$ M1-U1            |                                   |                                      |                      |                       |                  |
| $\Phi$ M1-U2            |                                   |                                      |                      |                       |                  |
| $\Phi$ M1-U8            |                                   |                                      |                      |                       |                  |
| $\Phi$ M1-U10           |                                   |                                      |                      |                       |                  |
| $\Phi$ M1-E47           | 15419 T to C                      | T251C                                | Leu to Pro           | -                     | 1                |
| $\Phi$ M1-E48           | 15424 T to C                      | T256C                                | Stop to Arg          | -                     | 2                |
| $\Phi$ M1-E49           |                                   |                                      | (extension of 10 aa) |                       |                  |
| Different mutations: 21 |                                   |                                      | Total mutations: 70  |                       |                  |
